# Supplementary material for: K+ Efflux and Retention in Response to NaCl Stress Do Not Predict Salt Tolerance in Contrasting Genotypes of Rice (Oryza sativa L.)
Source: PubMed Central journal article supplement (PMC3583904; doi:10.1371/journal.pone.0057767), 2013-02-27
Supplement: pone.0057767.s001.pdf [file pone.0057767.s001.pdf]

A. Correlations ( $R^2$ ) between measures of biomass, tissue  $K^+/Na^+$  content, and  $K^+$  efflux, accumulated from three cultivars of rice grown under varying nutritional conditions without NaCl stress.

|                                                        |                                                          | -NaCl        |             |              |             |             |            |                                          |                                         |                                           |                                          |                  |                 |                                                                 |                                                         |                                     |                                                          |                                                                     |      |
|--------------------------------------------------------|----------------------------------------------------------|--------------|-------------|--------------|-------------|-------------|------------|------------------------------------------|-----------------------------------------|-------------------------------------------|------------------------------------------|------------------|-----------------|-----------------------------------------------------------------|---------------------------------------------------------|-------------------------------------|----------------------------------------------------------|---------------------------------------------------------------------|------|
|                                                        |                                                          | Shoot FW (g) | Root FW (g) | Shoot DW (g) | Root DW (g) | Shoot DW:FW | Root DW:FW | Shoot $K^+$ ( $\mu\text{mol g}^{-1}$ FW) | Root $K^+$ ( $\mu\text{mol g}^{-1}$ FW) | Shoot $Na^+$ ( $\mu\text{mol g}^{-1}$ FW) | Root $Na^+$ ( $\mu\text{mol g}^{-1}$ FW) | Shoot $K^+:Na^+$ | Root $K^+:Na^+$ | Root $K^+$ w/ ST <sup>a</sup> NaCl ( $\mu\text{mol g}^{-1}$ FW) | Root $K^+$ loss w/ ST NaCl ( $\mu\text{mol g}^{-1}$ FW) | Root $K^+$ loss w/ ST NaCl (% Ctrl) | Peak $K^+$ efflux ( $\mu\text{mol g}^{-1}$ FW $h^{-1}$ ) | $K^+$ <sub>cyt</sub> <sup>b</sup> loss ( $\mu\text{mol g}^{-1}$ FW) |      |
| - NaCl                                                 | Shoot FW (g)                                             | 1.00         | 0.50        | 0.55         | 0.40        | 0.52        | 0.19       | 0.10                                     | 0.01                                    | 0.24                                      | 0.09                                     | 0.19             | 0.00            | 0.00                                                            | 0.00                                                    | 0.00                                | 0.04                                                     | 0.09                                                                |      |
|                                                        | Root FW (g)                                              |              | 1.00        | 0.09         | 0.97        | 0.30        | 0.55       | 0.27                                     | 0.23                                    | 0.33                                      | 0.07                                     | 0.38             | 0.04            | 0.23                                                            | 0.03                                                    | 0.18                                | 0.19                                                     | 0.25                                                                |      |
|                                                        | Shoot DW (g)                                             |              |             | 1.00         | 0.03        | 0.13        | 0.01       | 0.03                                     | 0.00                                    | 0.06                                      | 0.05                                     | 0.02             | 0.00            | 0.07                                                            | 0.20                                                    | 0.15                                | 0.01                                                     | 0.00                                                                |      |
|                                                        | Root DW (g)                                              |              |             |              | 1.00        | 0.22        | 0.64       | 0.18                                     | 0.18                                    | 0.30                                      | 0.03                                     | 0.33             | 0.01            | 0.21                                                            | 0.09                                                    | 0.23                                | 0.25                                                     | 0.31                                                                |      |
|                                                        | Shoot DW:FW                                              |              |             |              |             | 1.00        | 0.06       | 0.24                                     | 0.15                                    | 0.22                                      | 0.14                                     | 0.27             | 0.08            | 0.08                                                            | 0.01                                                    | 0.01                                | 0.02                                                     | 0.00                                                                |      |
|                                                        | Root DW:FW                                               |              |             |              |             |             | 1.00       | 0.09                                     | 0.06                                    | 0.49                                      | 0.12                                     | 0.33             | 0.01            | 0.08                                                            | 0.28                                                    | 0.31                                | 0.14                                                     | 0.27                                                                |      |
|                                                        | Shoot $K^+$ ( $\mu\text{mol g}^{-1}$ FW)                 |              |             |              |             |             |            | 1.00                                     | 0.68                                    | 0.24                                      | 0.44                                     | 0.61             | 0.49            | 0.64                                                            | 0.01                                                    | 0.27                                | 0.00                                                     | 0.00                                                                |      |
|                                                        | Root $K^+$ ( $\mu\text{mol g}^{-1}$ FW)                  |              |             |              |             |             |            |                                          | 1.00                                    | 0.20                                      | 0.24                                     | 0.53             | 0.57            | 0.93                                                            | 0.05                                                    | 0.15                                | 0.02                                                     | 0.00                                                                |      |
|                                                        | Shoot $Na^+$ ( $\mu\text{mol g}^{-1}$ FW)                |              |             |              |             |             |            |                                          |                                         | 1.00                                      | 0.49                                     | 0.69             | 0.23            | 0.21                                                            | 0.09                                                    | 0.25                                | 0.01                                                     | 0.04                                                                |      |
|                                                        | Root $Na^+$ ( $\mu\text{mol g}^{-1}$ FW)                 |              |             |              |             |             |            |                                          |                                         |                                           | 1.00                                     | 0.43             | 0.59            | 0.17                                                            | 0.00                                                    | 0.11                                | 0.09                                                     | 0.02                                                                |      |
|                                                        | Shoot $K^+:Na^+$                                         |              |             |              |             |             |            |                                          |                                         |                                           |                                          | 1.00             | 0.48            | 0.60                                                            | 0.03                                                    | 0.38                                | 0.05                                                     | 0.05                                                                |      |
|                                                        | Root $K^+:Na^+$                                          |              |             |              |             |             |            |                                          |                                         |                                           |                                          |                  | 1.00            | 0.50                                                            | 0.03                                                    | 0.08                                | 0.01                                                     | 0.02                                                                |      |
|                                                        | Root $K^+$ w/ ST NaCl ( $\mu\text{mol g}^{-1}$ FW)       |              |             |              |             |             |            |                                          |                                         |                                           |                                          |                  |                 |                                                                 | 1.00                                                    | 0.00                                | 0.36                                                     | 0.09                                                                | 0.01 |
|                                                        | Root $K^+$ loss w/ ST NaCl ( $\mu\text{mol g}^{-1}$ FW)  |              |             |              |             |             |            |                                          |                                         |                                           |                                          |                  |                 |                                                                 |                                                         | 1.00                                | 0.58                                                     | 0.16                                                                | 0.03 |
|                                                        | Root $K^+$ loss w/ ST NaCl (% Ctrl)                      |              |             |              |             |             |            |                                          |                                         |                                           |                                          |                  |                 |                                                                 |                                                         |                                     | 1.00                                                     | 0.10                                                                | 0.03 |
|                                                        | Peak $K^+$ efflux ( $\mu\text{mol g}^{-1}$ FW $h^{-1}$ ) |              |             |              |             |             |            |                                          |                                         |                                           |                                          |                  |                 |                                                                 |                                                         |                                     |                                                          |                                                                     | 1.00 |
| $K^+$ <sub>cyt</sub> loss ( $\mu\text{mol g}^{-1}$ FW) |                                                          |              |             |              |             |             |            |                                          |                                         |                                           |                                          |                  |                 |                                                                 |                                                         |                                     |                                                          |                                                                     | 1.00 |

<sup>a</sup> Short term (*i.e.*, 45 min); <sup>b</sup> cytosolic  $K^+$  content.

B. Correlations ( $R^2$ ) between measures of biomass, tissue  $K^+/Na^+$  content, and  $K^+$  efflux, accumulated from three cultivars of rice grown under varying nutritional conditions with and without NaCl stress.

|      |                                                                 | +NaCl          |              |             |              |             |             |            |                      |                           |                     |                          |                                          |                                         |                                               |                           |                                              |                          |                                           |                                          |                                                |                            |                                               |                           |                  |                 |      |
|------|-----------------------------------------------------------------|----------------|--------------|-------------|--------------|-------------|-------------|------------|----------------------|---------------------------|---------------------|--------------------------|------------------------------------------|-----------------------------------------|-----------------------------------------------|---------------------------|----------------------------------------------|--------------------------|-------------------------------------------|------------------------------------------|------------------------------------------------|----------------------------|-----------------------------------------------|---------------------------|------------------|-----------------|------|
|      |                                                                 | Survival (Y/N) | Shoot FW (g) | Root FW (g) | Shoot DW (g) | Root DW (g) | Shoot DW:FW | Root DW:FW | Shoot FW decline (g) | Shoot FW decline (% Ctrl) | Root FW decline (g) | Root FW decline (% Ctrl) | Shoot $K^+$ ( $\mu\text{mol g}^{-1}$ FW) | Root $K^+$ ( $\mu\text{mol g}^{-1}$ FW) | Shoot $K^+$ loss ( $\mu\text{mol g}^{-1}$ FW) | Shoot $K^+$ loss (% Ctrl) | Root $K^+$ loss ( $\mu\text{mol g}^{-1}$ FW) | Root $K^+$ loss (% Ctrl) | Shoot $Na^+$ ( $\mu\text{mol g}^{-1}$ FW) | Root $Na^+$ ( $\mu\text{mol g}^{-1}$ FW) | Shoot $Na^+$ gain ( $\mu\text{mol g}^{-1}$ FW) | Shoot $Na^+$ gain (% Ctrl) | Root $Na^+$ gain ( $\mu\text{mol g}^{-1}$ FW) | Root $Na^+$ gain (% Ctrl) | Shoot $K^+:Na^+$ | Root $K^+:Na^+$ |      |
| NaCl | Shoot FW (g)                                                    | 0.36           | 0.66         | 0.43        | 0.66         | 0.19        | 0.40        | 0.14       | 0.43                 | 0.07                      | 0.01                | 0.10                     | 0.13                                     | 0.03                                    | 0.39                                          | 0.29                      | 0.00                                         | 0.01                     | 0.44                                      | 0.33                                     | 0.44                                           | 0.36                       | 0.35                                          | 0.33                      | 0.20             | 0.40            |      |
|      | Root FW (g)                                                     | 0.31           | 0.23         | 0.42        | 0.26         | 0.02        | 0.17        | 0.16       | 0.07                 | 0.05                      | 0.58                | 0.03                     | 0.00                                     | 0.16                                    | 0.09                                          | 0.02                      | 0.37                                         | 0.24                     | 0.05                                      | 0.00                                     | 0.05                                           | 0.01                       | 0.00                                          | 0.03                      | 0.11             | 0.07            |      |
|      | Shoot DW (g)                                                    | 0.11           | 0.12         | 0.04        | 0.12         | 0.03        | 0.02        | 0.01       | 0.54                 | 0.05                      | 0.01                | 0.02                     | 0.06                                     | 0.00                                    | 0.10                                          | 0.08                      | 0.08                                         | 0.07                     | 0.06                                      | 0.32                                     | 0.06                                           | 0.07                       | 0.33                                          | 0.25                      | 0.00             | 0.25            |      |
|      | Root DW (g)                                                     | 0.30           | 0.19         | 0.39        | 0.21         | 0.03        | 0.15        | 0.21       | 0.01                 | 0.08                      | 0.56                | 0.02                     | 0.00                                     | 0.10                                    | 0.10                                          | 0.03                      | 0.32                                         | 0.23                     | 0.05                                      | 0.00                                     | 0.05                                           | 0.01                       | 0.00                                          | 0.03                      | 0.08             | 0.02            |      |
|      | Shoot DW:FW                                                     | 0.21           | 0.56         | 0.32        | 0.44         | 0.13        | 0.74        | 0.00       | 0.01                 | 0.30                      | 0.01                | 0.12                     | 0.00                                     | 0.25                                    | 0.07                                          | 0.04                      | 0.05                                         | 0.01                     | 0.37                                      | 0.04                                     | 0.36                                           | 0.32                       | 0.05                                          | 0.13                      | 0.49             | 0.24            |      |
|      | Root DW:FW                                                      | 0.32           | 0.05         | 0.21        | 0.09         | 0.08        | 0.00        | 0.51       | 0.09                 | 0.17                      | 0.11                | 0.03                     | 0.07                                     | 0.00                                    | 0.12                                          | 0.10                      | 0.05                                         | 0.10                     | 0.03                                      | 0.00                                     | 0.03                                           | 0.00                       | 0.00                                          | 0.00                      | 0.00             | 0.02            | 0.02 |
|      | Shoot $K^+$ ( $\mu\text{mol g}^{-1}$ FW)                        | 0.01           | 0.07         | 0.15        | 0.12         | 0.27        | 0.04        | 0.00       | 0.00                 | 0.02                      | 0.07                | 0.02                     | 0.37                                     | 0.34                                    | 0.01                                          | 0.06                      | 0.47                                         | 0.44                     | 0.00                                      | 0.05                                     | 0.00                                           | 0.00                       | 0.06                                          | 0.10                      | 0.23             | 0.10            |      |
|      | Root $K^+$ ( $\mu\text{mol g}^{-1}$ FW)                         | 0.00           | 0.03         | 0.09        | 0.03         | 0.09        | 0.03        | 0.01       | 0.01                 | 0.03                      | 0.27                | 0.13                     | 0.48                                     | 0.69                                    | 0.07                                          | 0.22                      | 0.90                                         | 0.39                     | 0.02                                      | 0.10                                     | 0.02                                           | 0.05                       | 0.10                                          | 0.11                      | 0.24             | 0.09            |      |
|      | Shoot $Na^+$ ( $\mu\text{mol g}^{-1}$ FW)                       | 0.27           | 0.16         | 0.25        | 0.20         | 0.20        | 0.01        | 0.45       | 0.03                 | 0.24                      | 0.02                | 0.07                     | 0.01                                     | 0.04                                    | 0.01                                          | 0.02                      | 0.11                                         | 0.02                     | 0.03                                      | 0.01                                     | 0.03                                           | 0.01                       | 0.00                                          | 0.00                      | 0.11             | 0.02            |      |
|      | Root $Na^+$ ( $\mu\text{mol g}^{-1}$ FW)                        | 0.05           | 0.04         | 0.10        | 0.00         | 0.24        | 0.20        | 0.01       | 0.04                 | 0.06                      | 0.01                | 0.02                     | 0.05                                     | 0.00                                    | 0.01                                          | 0.04                      | 0.00                                         | 0.01                     | 0.04                                      | 0.02                                     | 0.04                                           | 0.04                       | 0.00                                          | 0.23                      | 0.00             | 0.02            |      |
|      | Shoot $K^+:Na^+$                                                | 0.10           | 0.22         | 0.41        | 0.32         | 0.01        | 0.07        | 0.18       | 0.01                 | 0.22                      | 0.04                | 0.02                     | 0.17                                     | 0.38                                    | 0.01                                          | 0.01                      | 0.48                                         | 0.27                     | 0.04                                      | 0.01                                     | 0.04                                           | 0.00                       | 0.01                                          | 0.04                      | 0.47             | 0.14            |      |
|      | Root $K^+:Na^+$                                                 | 0.01           | 0.00         | 0.00        | 0.01         | 0.20        | 0.02        | 0.00       | 0.00                 | 0.00                      | 0.03                | 0.06                     | 0.32                                     | 0.38                                    | 0.05                                          | 0.16                      | 0.36                                         | 0.15                     | 0.03                                      | 0.00                                     | 0.03                                           | 0.05                       | 0.01                                          | 0.23                      | 0.16             | 0.17            |      |
|      | Root $K^+$ w/ ST <sup>a</sup> NaCl ( $\mu\text{mol g}^{-1}$ FW) | 0.01           | 0.04         | 0.13        | 0.05         | 0.07        | 0.05        | 0.00       | 0.07                 | 0.09                      | 0.28                | 0.08                     | 0.37                                     | 0.50                                    | 0.03                                          | 0.14                      | 0.90                                         | 0.50                     | 0.01                                      | 0.18                                     | 0.01                                           | 0.04                       | 0.18                                          | 0.16                      | 0.22             | 0.02            |      |
|      | Root $K^+$ loss w/ ST NaCl ( $\mu\text{mol g}^{-1}$ FW)         | 0.03           | 0.01         | 0.03        | 0.02         | 0.01        | 0.02        | 0.23       | 0.21                 | 0.18                      | 0.00                | 0.05                     | 0.08                                     | 0.17                                    | 0.12                                          | 0.12                      | 0.00                                         | 0.07                     | 0.02                                      | 0.14                                     | 0.02                                           | 0.00                       | 0.14                                          | 0.07                      | 0.00             | 0.34            |      |
|      | Root $K^+$ loss w/ ST NaCl (% Ctrl)                             | 0.02           | 0.01         | 0.07        | 0.03         | 0.05        | 0.01        | 0.14       | 0.17                 | 0.14                      | 0.08                | 0.00                     | 0.03                                     | 0.00                                    | 0.03                                          | 0.00                      | 0.21                                         | 0.41                     | 0.00                                      | 0.26                                     | 0.00                                           | 0.01                       | 0.28                                          | 0.24                      | 0.01             | 0.14            |      |
|      | Peak $K^+$ efflux ( $\mu\text{mol g}^{-1}$ FW $h^{-1}$ )        | 0.00           | 0.27         | 0.34        | 0.24         | 0.25        | 0.25        | 0.29       | 0.00                 | 0.20                      | 0.19                | 0.01                     | 0.05                                     | 0.01                                    | 0.10                                          | 0.10                      | 0.15                                         | 0.11                     | 0.09                                      | 0.01                                     | 0.08                                           | 0.02                       | 0.00                                          | 0.04                      | 0.10             | 0.00            |      |
|      | $K^+$ loss <sup>b</sup> ( $\mu\text{mol g}^{-1}$ FW)            | 0.04           | 0.17         | 0.39        | 0.24         | 0.15        | 0.03        | 0.44       | 0.00                 | 0.14                      | 0.12                | 0.05                     | 0.05                                     | 0.03                                    | 0.10                                          | 0.07                      | 0.01                                         | 0.00                     | 0.14                                      | 0.10                                     | 0.13                                           | 0.06                       | 0.11                                          | 0.11                      | 0.08             | 0.09            |      |

<sup>a</sup> Short term (i.e., 45 min); <sup>b</sup> cytosolic  $K^+$  content.
